# Supplementary material for: Low-temperature water-assisted crystallization approach to MOF@TiO2 core–shell nanostructures for efficient dye removal
Source: Royal Society of Chemistry journal article supplement (doi:10.1039/d2qi00293k), 2022-01-01
Supplement: d2qi00293k1.pdf [file d2qi00293k1.pdf]

## Supplementary Information

# Low temperature water-assisted crystallization approach to MOF@TiO<sub>2</sub> core-shell nanostructures for efficient dye removal

Shouxin Bao,<sup>a,b,‡</sup> Mingyang Lv,<sup>a,‡</sup> Chen Zhao,<sup>c</sup> Ping She,<sup>c</sup> Zhenyu Lei,<sup>c</sup> Xiaowei Song<sup>a,\*</sup> and Mingjun Jia<sup>c,\*</sup>

<sup>a</sup> State Key Laboratory of Inorganic Synthesis and Preparative Chemistry, College of Chemistry, Jilin University, Changchun 130012, P. R. China.

<sup>b</sup> State Key Laboratory of Radiation Medicine and Protection, School for Radiological and Interdisciplinary Sciences (RAD-X) & Collaborative Innovation Center of Radiation Medicine of Jiangsu Higher Education Institutions, Soochow University, Suzhou 215123, P. R. China.

<sup>c</sup> Key Laboratory of Surface and Interface Chemistry of Jilin Province, College of Chemistry, Jilin University, Changchun 130012, P. R. China.

Corresponding authors: [xiaoweisong@jlu.edu.cn](mailto:xiaoweisong@jlu.edu.cn) (X. Song), [jiamj@jlu.edu.cn](mailto:jiamj@jlu.edu.cn) (M. Jia).

<sup>‡</sup> These authors contributed equally to this work.

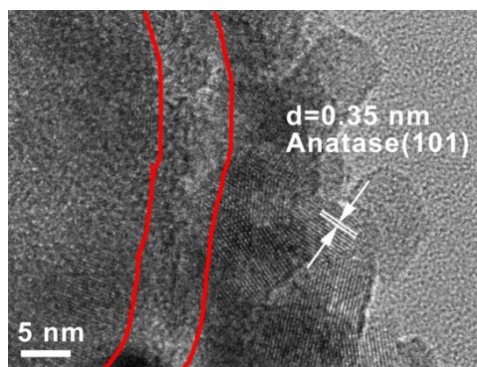

**Fig. S1** HRTEM image of the interface of the MOF core and  $\text{TiO}_2$  shell in  $\text{MOF@TiO}_2\text{-A}$ .

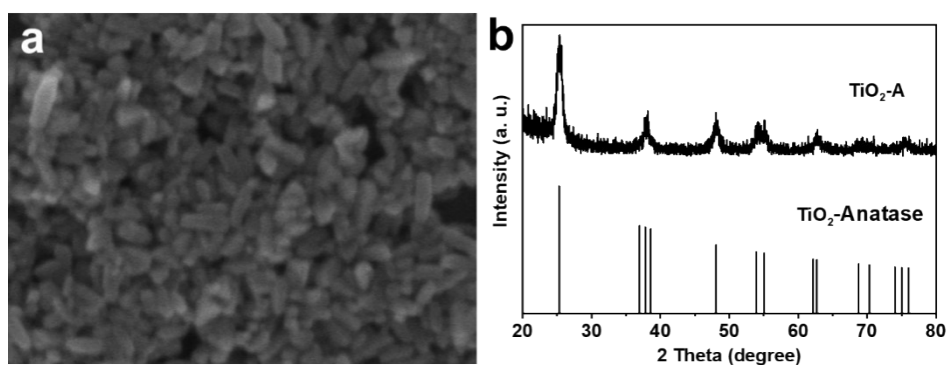

**Fig. S2** SEM image (a) and PXRD pattern (b) of the as prepared  $\text{TiO}_2\text{-A}$ .

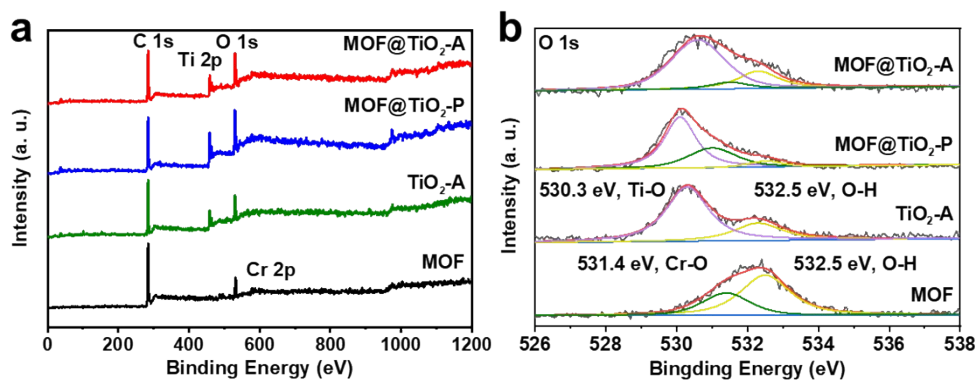

**Fig. S3** XPS survey spectra (a) and O 1s XPS spectra of MOF,  $\text{TiO}_2\text{-A}$ ,  $\text{MOF@TiO}_2\text{-P}$  and  $\text{MOF@TiO}_2\text{-A}$  (b).

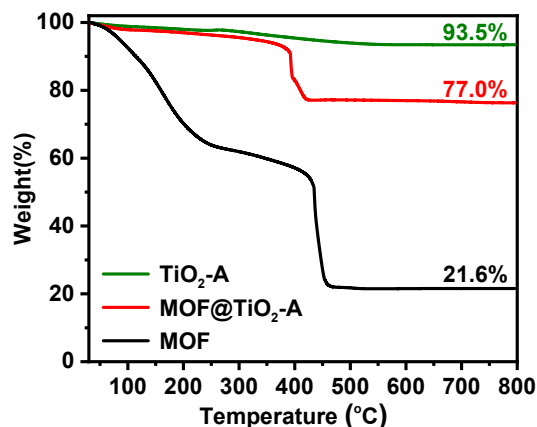

**Fig. S4** TG curves of MOF, TiO<sub>2</sub>-A and MOF@TiO<sub>2</sub>-A.

The mass percentages of MOF and TiO<sub>2</sub> components in MOF@TiO<sub>2</sub>-A are assumed to be  $x$  and  $1-x$ . Equation below is obtained according to the remained weights of MOF, TiO<sub>2</sub>-A and MOF@TiO<sub>2</sub>-A.

$$21.6\%x + 93.5\% (1-x) = 77.0\%$$

$x$  is equal to 23% by solving this equation. That is, the mass percentages of MOF and TiO<sub>2</sub> components in MOF@TiO<sub>2</sub>-A are 23 wt% and 77 wt%, respectively. This result is in consistent with that determined by ICP result (26% and 74%), which can be calculated according to the Cr:Ti molar ratio (1:11.5) and the molecular weight of MIL-101 (Cr<sub>3</sub>OH(H<sub>2</sub>O)<sub>2</sub>O[(C<sub>6</sub>H<sub>4</sub>)-(CO<sub>2</sub>)<sub>2</sub>]<sub>3</sub>·15H<sub>2</sub>O, 987 g mol<sup>-1</sup>) and TiO<sub>2</sub>.

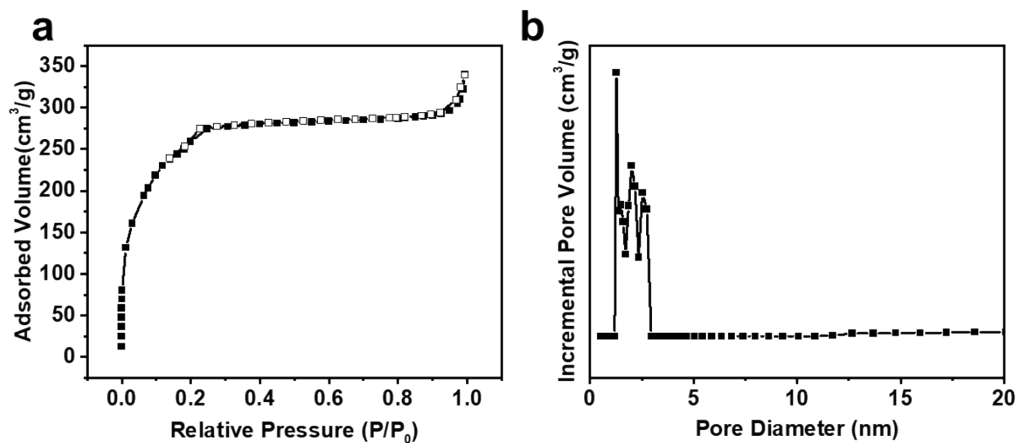

**Fig. S5** Nitrogen adsorption-desorption isotherms (a), and pore size distribution curves (b) of MOF@TiO<sub>2</sub>-P.

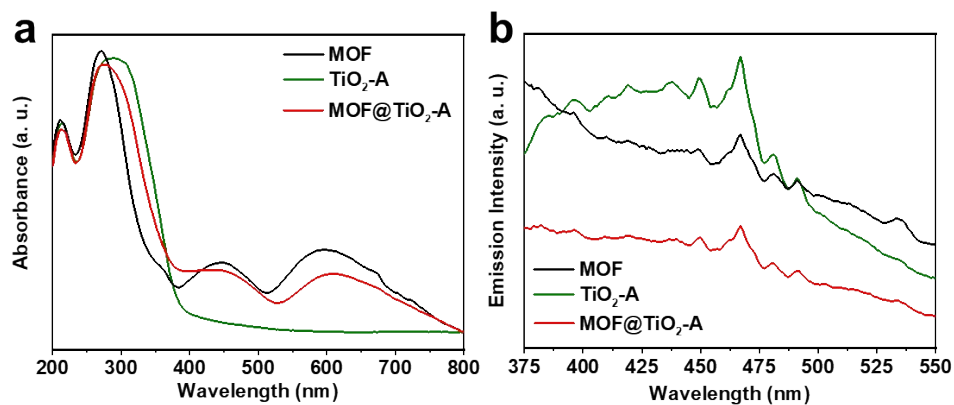

**Fig. S6** UV-vis DRS (a) and PL spectra of MOF, TiO<sub>2</sub>-A and MOF@TiO<sub>2</sub>-A with 300 nm excitation.

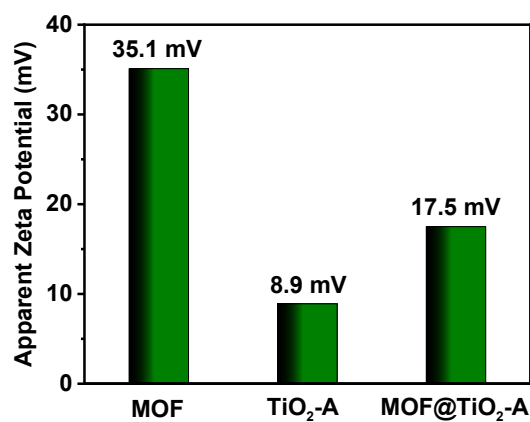

**Fig. S7** Zeta potential of MOF, TiO<sub>2</sub>-A, and MOF@TiO<sub>2</sub>-A.

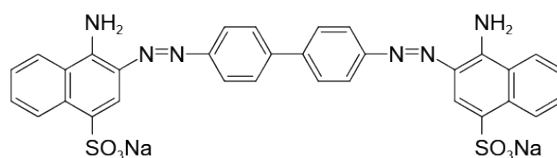

**Fig. S8** Molecular structure of CR.

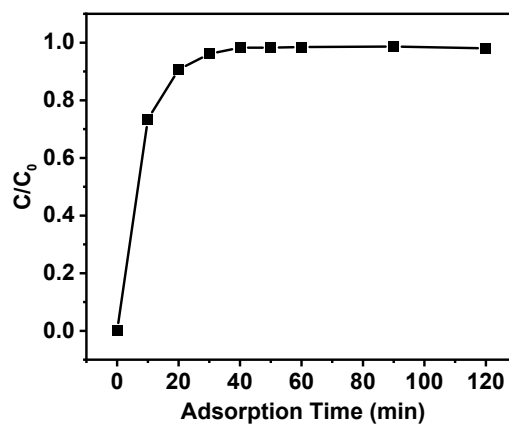

**Fig. S9** Time-dependent adsorption study of MOF@TiO<sub>2</sub>-A.

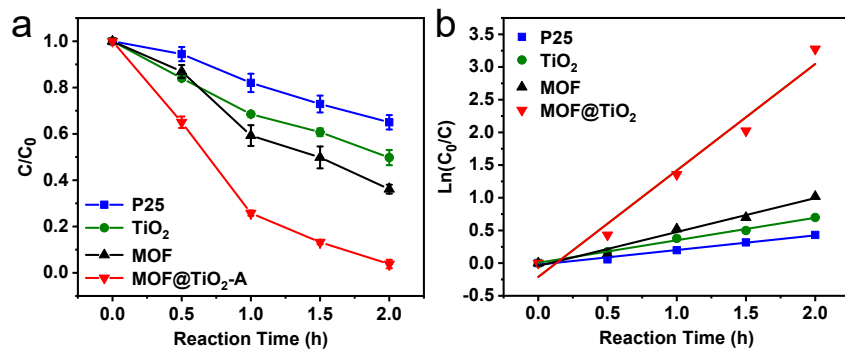

Fig. S10 Photocatalytic degradation of CR (a) and kinetic study of the degradation process (b).

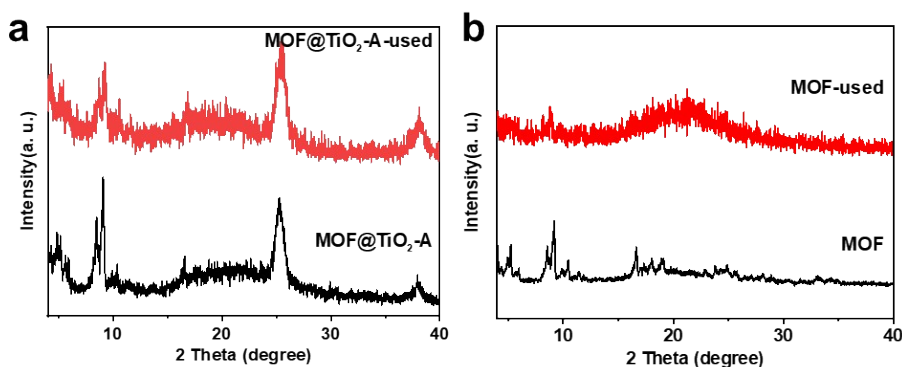

Fig. S11 PXRD patterns of fresh and used  $MOF@TiO_2-A$  (a) and MOF (b).

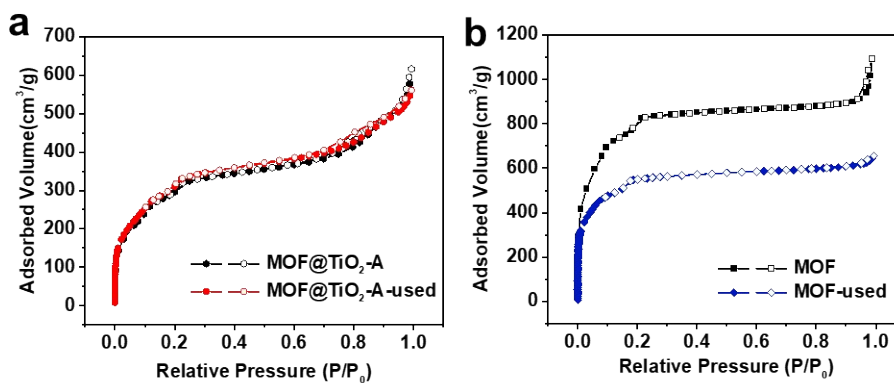

Fig. S12 Nitrogen adsorption-desorption isotherms of fresh and used  $MOF@TiO_2-A$  (a) and MOF (b).

Table S1 BET surface and pore volume of fresh and used  $MOF@TiO_2-A$ .

| Sample         | $S_{BET}$ ( $m^2/g$ ) |       |           | $V_{total}$ ( $cm^3/g$ ) |       |           |
|----------------|-----------------------|-------|-----------|--------------------------|-------|-----------|
|                | before                | after | decreased | before                   | after | decreased |
| $MOF@-TiO_2-A$ | 1116                  | 1110  | 0.5%      | 0.95                     | 0.87  | 8.4%      |
| MOF            | 2823                  | 1682  | 40.4%     | 1.69                     | 1.02  | 39.6%     |
